# Supplementary material for: Contact Laxative Use and the Risk of Arteriovenous Fistula Maturation Failure in Patients Undergoing Hemodialysis: A Multi-Center Cohort Study
Source: MDPI journal article supplement (doi:10.3390/ijerph19116842), 2022-06-03
Supplement: s1 [file s1]

## **Title**

### **Contact Laxative Use and the Risk of Arteriovenous Fistula Maturation Failure in Hemodialysis Patients: A Multi-Center Cohort Study**

Trung Hoang Anh, Phung Anh Nguyen, Anh Duong, I-Jen Chiu, Chu-Lin Chou, Tzu-Hao Chang, Chih-Wei Huang, Mai-Szu Wu, Chia-Te Liao, Yung-Ho Hsu

|                                                                                            |   |
|--------------------------------------------------------------------------------------------|---|
| <b>Title</b> .....                                                                         | 1 |
| <b>Table S1:</b> Dialysis and vascular access procedures related codes in this study ..... | 2 |
| <b>Table S2:</b> List of medications use in this study .....                               | 3 |

**Table S1:** Dialysis and vascular access procedures related codes in this study.

| Procedures                                         | NHI code |
|----------------------------------------------------|----------|
| <b>Vascular access procedures for hemodialysis</b> |          |
| AVF creation                                       | 69032C   |
| AVG creation                                       | 69034C   |
| PCVC insertion                                     | 69039B   |
|                                                    | 69039B   |
|                                                    | 47061B   |
|                                                    | 47059B   |
| PCVC removal                                       | 62009C   |
| TCVC insertion                                     | 69006C   |
|                                                    | 47065B   |
|                                                    | 47084B   |
| Surgical intervention                              | 69038C   |
|                                                    | 69003B   |
|                                                    | 69001B   |
|                                                    | 69002B   |
| Radiological intervention                          | 58004C   |
|                                                    | 58006C   |
|                                                    | 58005C   |
|                                                    | 33074B   |
|                                                    | 33115B   |
| <b>Dialysis procedures</b>                         |          |
| Hemodialysis                                       | 58001C   |
|                                                    | 58019C   |
|                                                    | 58020C   |
|                                                    | 58021C   |
|                                                    | 58022C   |
|                                                    | 58023C   |
|                                                    | 58024C   |
|                                                    | 58025C   |
|                                                    | 58029C   |
| Peritoneal dialysis                                | 58002C   |
|                                                    | 58009B   |
|                                                    | 58010B   |
|                                                    | 58011C   |
|                                                    | 58017B   |
|                                                    | 58017C   |
|                                                    | 58012B   |

**Note:** NHI, National health insurance; AVF, Arteriovenous fistula; AVG, Arteriovenous graft; PCVC, Permanent central venous catheter; TCVC, Temporary central venous catheter.

**Table S2:** List of medications use in this study.

| ATC code                         | ATC name                                   |
|----------------------------------|--------------------------------------------|
| <b>A06AA</b>                     | Softeners, emollients                      |
| <b>A06AB</b>                     | Contact laxatives                          |
| <b>A06AC</b>                     | Bulk-forming laxatives                     |
| <b>A06AD</b>                     | Osmotically acting laxatives               |
| <b>B01AC</b>                     | Antiplatelets                              |
| <b>B03XA01, B03XA02, B03XA03</b> | Erythropoietin stimulating agents          |
| <b>C01DA</b>                     | Nitrates                                   |
| <b>C07</b>                       | Beta-blockers                              |
| <b>C08</b>                       | Calcium channel blockers                   |
| <b>C09A, C09C</b>                | ACE inhibitors, angiotensin II antagonists |
| <b>C10AA</b>                     | Statins                                    |
| <b>C03CA</b>                     | Loop diuretics                             |

**Note:** ATC, Anatomical Therapeutic Chemical
